# Supplementary material for: Efficacy and Safety of Third Dose of the COVID-19 Vaccine among Solid Organ Transplant Recipients: A Systemic Review and Meta-Analysis
Source: MDPI journal article supplement (doi:10.3390/vaccines10010095), 2022-01-09
Supplement: s1 [file s1]

Supplementary Online Content

Methods

Document S1 . Literature search  
strategy.....2

Results

Table S1 .....3

Figure S1 .....4

This supplementary material has been provided by the authors to give readers additional information about the work.

**Document S1.** Systematic review search terms for PubMed(MEDLINE), EMBASE and Web of Science databases.

|                       |                                                                                                                                                                                                                                                                                                                                                                                                                                                                                                                                                                                                                                                                                                                                                                                |
|-----------------------|--------------------------------------------------------------------------------------------------------------------------------------------------------------------------------------------------------------------------------------------------------------------------------------------------------------------------------------------------------------------------------------------------------------------------------------------------------------------------------------------------------------------------------------------------------------------------------------------------------------------------------------------------------------------------------------------------------------------------------------------------------------------------------|
| <b>PubMed</b>         | <p>("Three Doses" or "third dose" or "booster" or "third-dose" or "third COVID-19 vaccine" or "3rd dose" or "3 doses" or "prime-boost vaccination" or "three-dose" or "third doses" or "third shot" or "third shots")</p> <p>AND</p> <p>("Solid-Organ Transplant Recipients" or "immunosuppressed" or "transplant recipients" or "organ-transplant recipients")</p> <p>AND</p> <p>("Covid-19 Vaccine" or "messenger RNA vaccine" or "mRNA vaccine" or "Pfizer" or "mRNA-1273" or "BNT162b2" or "COVID-19 mRNA vaccine" or "SARS-CoV-2 Vaccine" or "BioNTech" or "mRNA vaccination" or "messenger RNA-based vaccines" or "anti-SARS-CoV-2")</p>                                                                                                                                 |
| <b>EMBASE</b>         | <p>('three doses' OR 'third dose' OR 'booster' OR 'third-dose' OR 'third covid-19 vaccine' OR '3rd dose' OR '3 doses' OR 'prime-boost vaccination')</p> <p>AND</p> <p>('solid-organ transplant recipients' OR 'immunosuppressed' OR 'transplant recipients'/exp OR 'transplant recipients' OR 'organ-transplant recipients')</p> <p>AND</p> <p>('covid-19 vaccine'/exp OR 'covid-19 vaccine' OR 'messenger rna vaccine'/exp OR 'messenger rna vaccine' OR 'mrna vaccine'/exp OR 'mrna vaccine' OR 'pfizer'/exp OR 'pfizer' OR 'mrna-1273'/exp OR 'mrna-1273' OR 'bnt162b2'/exp OR 'bnt162b2' OR 'covid-19 mrna vaccine' OR 'sars-cov-2 vaccine'/exp OR 'sars-cov-2 vaccine' OR 'biontech' OR 'mrna vaccination' OR 'messenger rna-based vaccines' OR 'anti-sars-cov-2')</p>    |
| <b>Web of Science</b> | <p>('three doses' OR 'third dose' OR 'booster' OR 'third-dose' OR 'third covid-19 vaccine' OR '3rd dose' OR '3 doses' OR 'prime-boost vaccination' (Topic))</p> <p>AND</p> <p>('solid-organ transplant recipients' OR 'immunosuppressed' OR 'transplant recipients' OR 'transplant recipients' OR 'organ-transplant recipients' (Topic))</p> <p>AND</p> <p>('covid-19 vaccine' OR 'covid-19 vaccine' OR 'messenger rna vaccine' OR 'messenger rna vaccine' OR 'mrna vaccine' OR 'mrna vaccine' OR 'pfizer'/exp OR 'pfizer' OR 'mrna-1273'/exp OR 'mrna-1273' OR 'bnt162b2'/exp OR 'bnt162b2' OR 'covid-19 mrna vaccine' OR 'sars-cov-2 vaccine' OR 'sars-cov-2 vaccine' OR 'biotech' OR 'mrna vaccination' OR 'messenger rna-based vaccines' OR 'anti-sars-cov-2' (Topic))</p> |
