# Supplementary material for: Efficacy and Safety of Third Dose of the COVID-19 Vaccine among Solid Organ Transplant Recipients: A Systemic Review and Meta-Analysis
Source: MDPI journal article supplement (doi:10.3390/vaccines10010095), 2022-01-09

Figure S1. A sensitivity analysis conducted using the generalized linear mixed models (GLMM) showing the rate of antibody response after the third vaccine among solid organ transplant recipients.

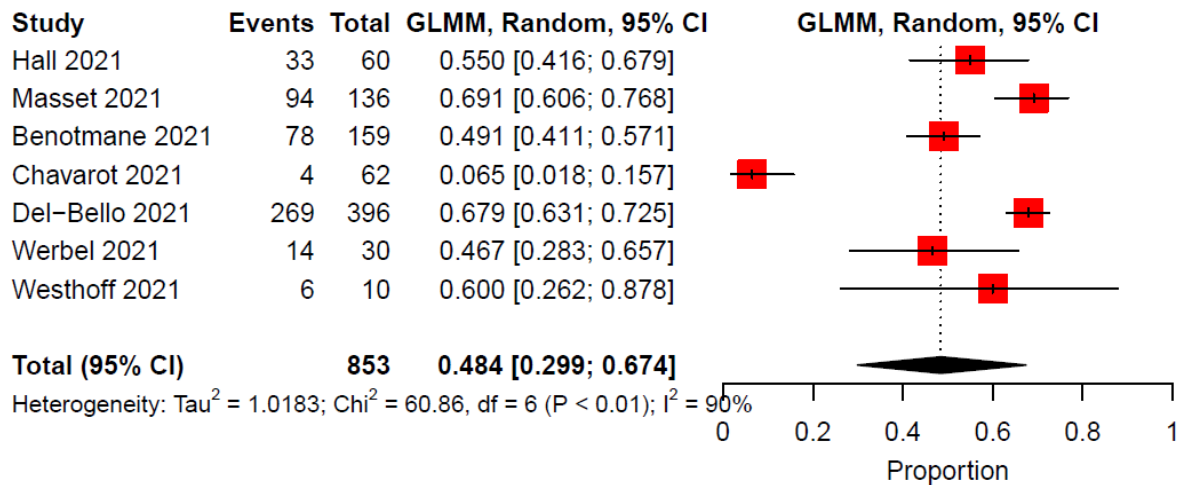

Supplement: s1 [file s1]
