# Supplementary material for: Efficacy and Safety of Third Dose of the COVID-19 Vaccine among Solid Organ Transplant Recipients: A Systemic Review and Meta-Analysis
Source: MDPI journal article supplement (doi:10.3390/vaccines10010095), 2022-01-09
Supplement: s1 [file s1]

**Table S1.** The risk of bias in non-randomized studies of interventions (ROBINS-I) assessment tool, including the grading of the individual eight domains.

| First Author ( <i>year</i> ) | Overall bias | Confounding | Selection of participants into the study | Classification of interventions | Deviations from intended interventions | Missing data | Measurement of outcomes | Selection of the reported result |
|------------------------------|--------------|-------------|------------------------------------------|---------------------------------|----------------------------------------|--------------|-------------------------|----------------------------------|
| Hall (2021)*                 | N/A          | N/A         | N/A                                      | N/A                             | N/A                                    | N/A          | N/A                     | N/A                              |
| Masset (2021)                | Moderate     | Critical    | Low                                      | NI                              | Low                                    | Low          | Moderate                | Low                              |
| Benotmane (2021)             | Moderate     | Critical    | Low                                      | NI                              | Low                                    | Low          | Low                     | Low                              |
| Chavarot (2021)              | Moderate     | Critical    | Moderate                                 | NI                              | Low                                    | Low          | Low                     | Low                              |
| Bello (2021)                 | Serious      | Critical    | Low                                      | NI                              | Low                                    | Low          | Serious                 | Low                              |
| Werbel (2021)                | Moderate     | Critical    | Low                                      | NI                              | Low                                    | Low          | Moderate                | Low                              |
| Westhoff (2021)              | Moderate     | Critical    | Low                                      | NI                              | Low                                    | Low          | Low                     | Low                              |

*Grading options include: Low, Moderate, Serious, Critical, or No Information (NI)*

\*ROBINS-I is not applicable to randomized control trials.
